# Supplementary material
Source: PubMed Central journal article supplement (PMC4893815)
Supplement: NIHMS789971-supplement-SI.pdf [file NIHMS789971-supplement-SI.pdf]

Supporting Information for:

**Challenge of mimicking the influences of the cellular environment on RNA structure by PEG-induced macromolecular crowding**

Jillian Tyrrell, Kevin M. Weeks\*, Gary J. Pielak\*

\* Correspondence: gary\_pielak@unc.edu and weeks@unc.edu

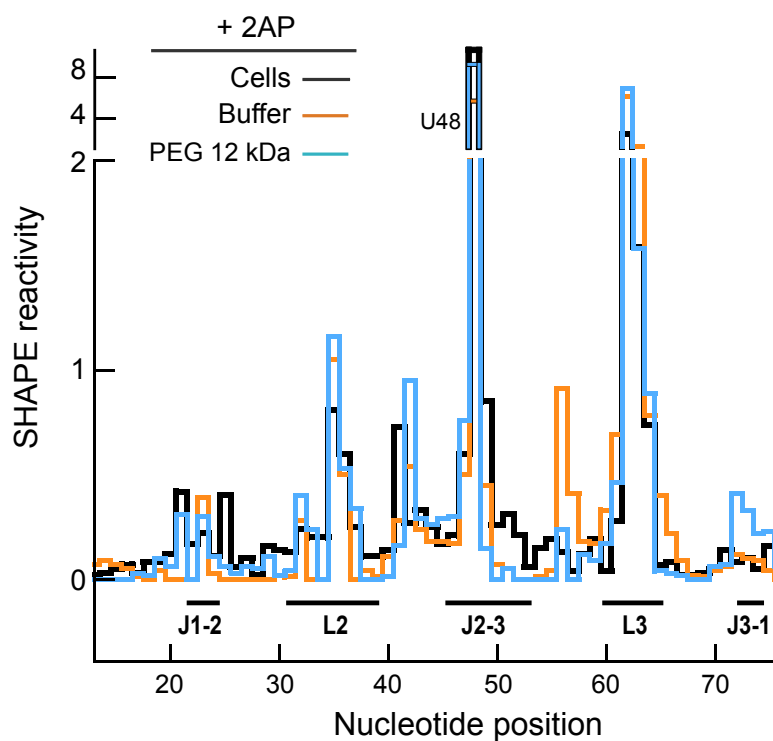

**Figure S1.** SHAPE reactivity profiles of the 2AP-bound *ade* aptamer RNA in cells, buffer, and 12000 Da PEG. The complete data are available in supporting Tables S1 and S2.

**Table S1.** SHAPE reactivities for the ligand-free aptamer. Included are data for in-cell, dilute solution, and as a function of PEG cosolvent. Values report the mean of two independent replicates; typical variation in reactivities between repeated experiments was  $\pm 10\%$  or less.

**Table S2.** SHAPE reactivities for the ligand-bound aptamer, reported as described for Table S1.
